# Supplementary material for: 3,4′,5-Trimethoxy-trans-stilbene ameliorates hepatic insulin resistance and oxidative stress in diabetic obese mice through insulin and Nrf2 signaling pathways
Source: Royal Society of Chemistry journal article supplement (doi:10.1039/d3fo04158a), 2024-01-01

**Figure 2. Original western blot for pIRS1 /IRS1/GAPDH**

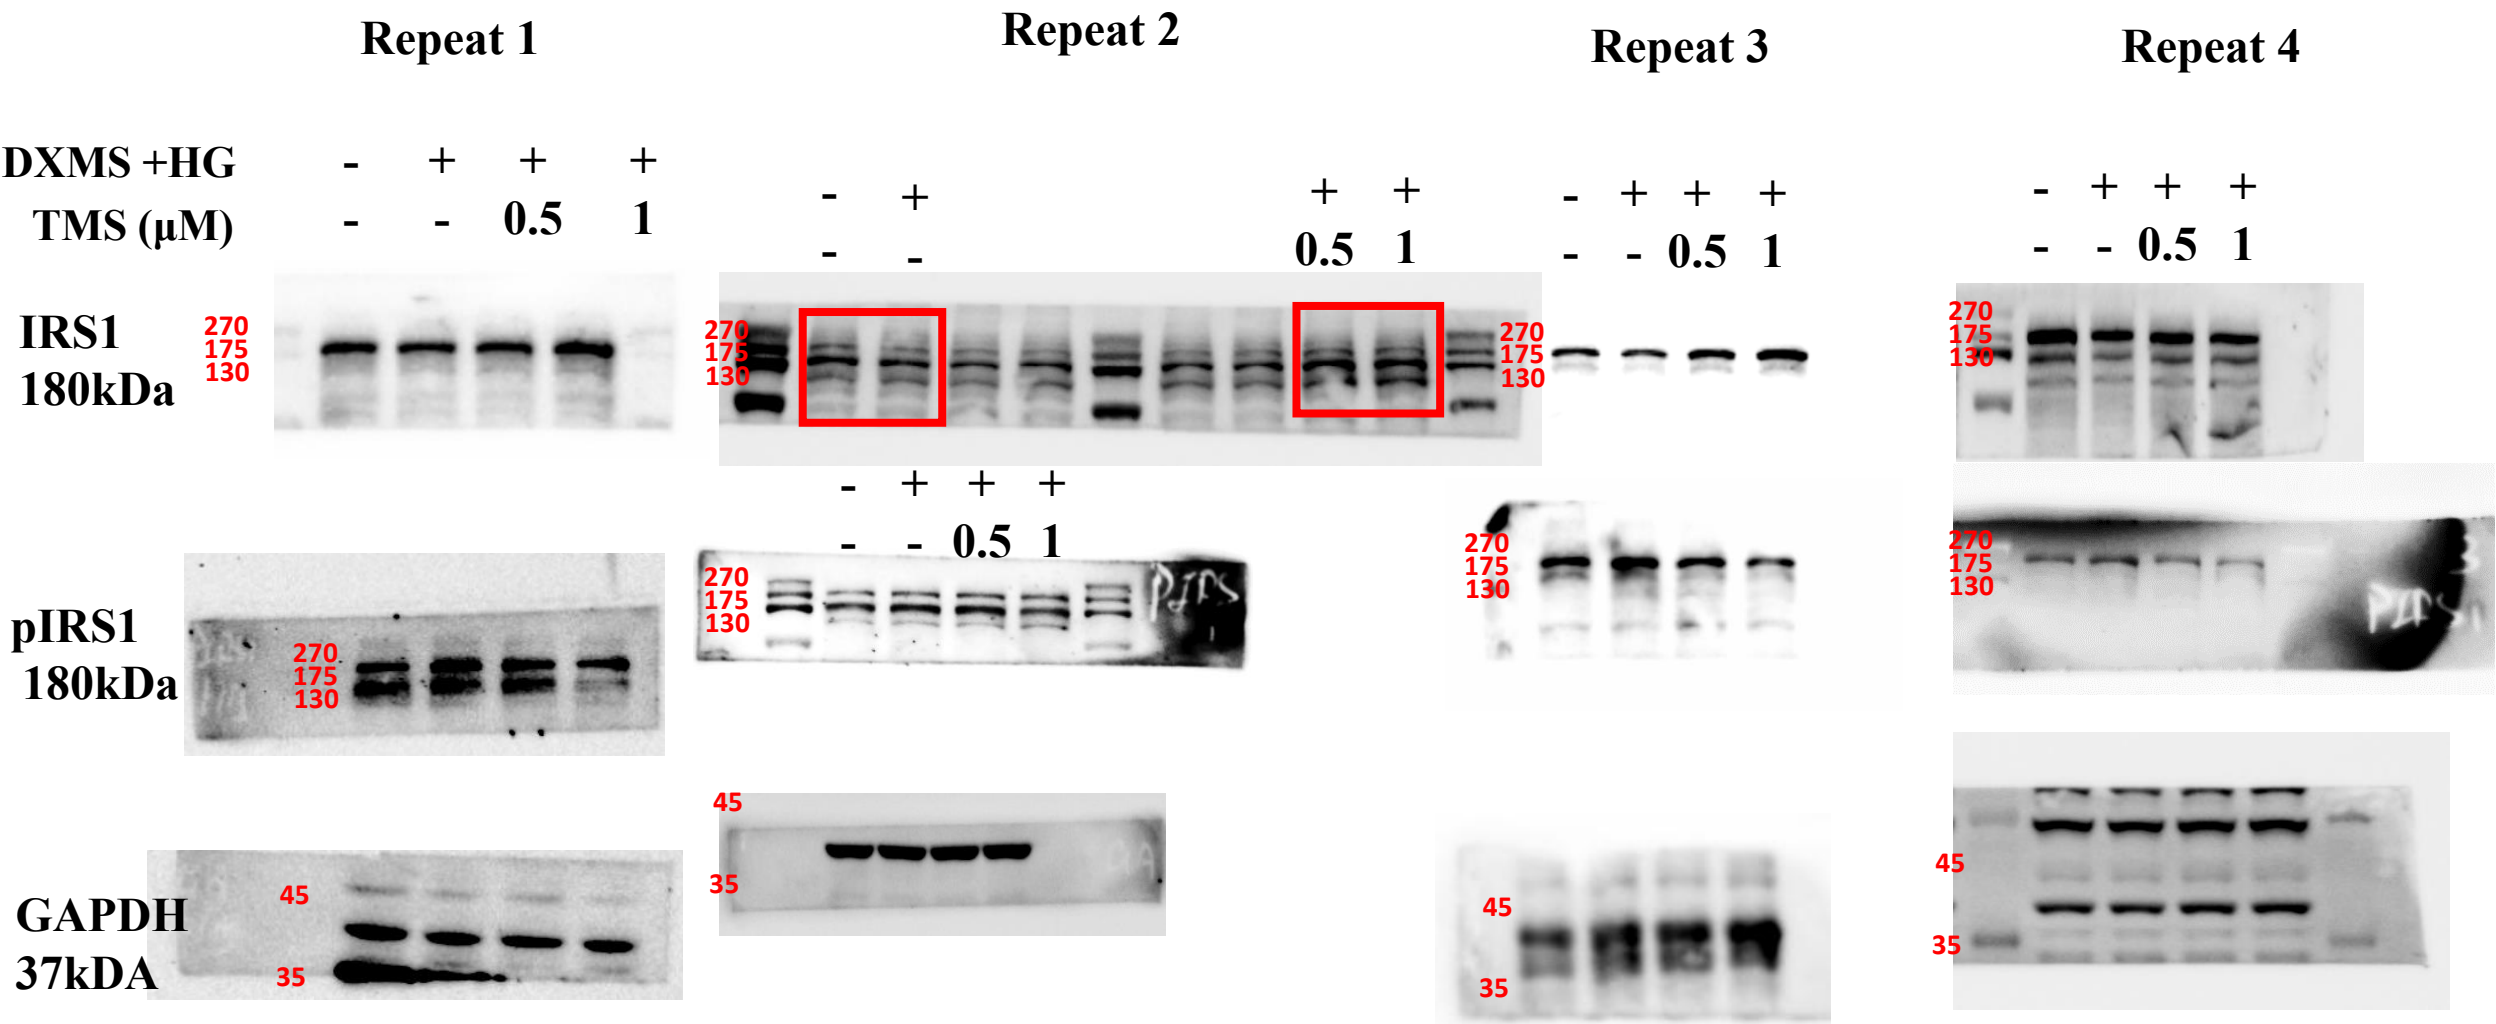

**Figure 2. Original western blot for IRS2/GAPDH**

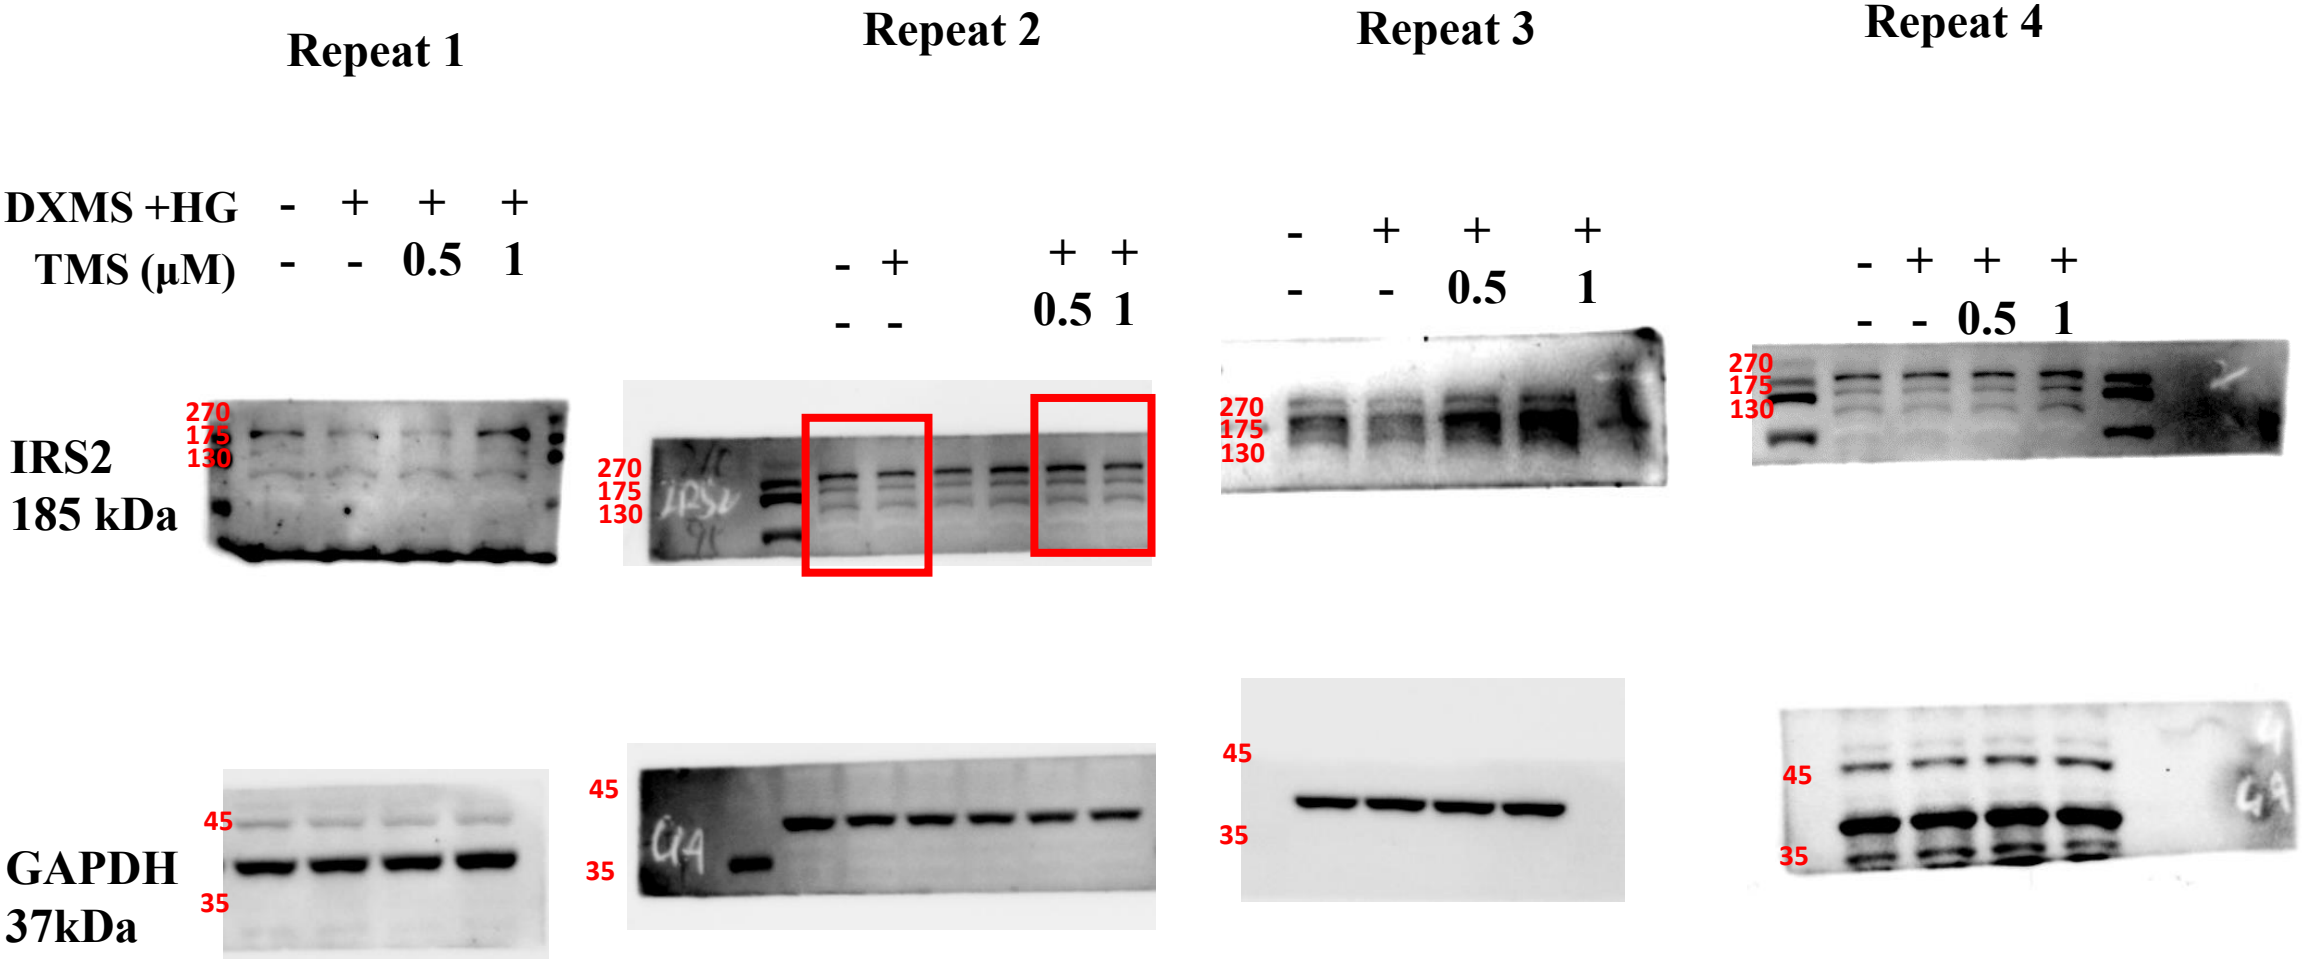

**Figure 2. Original western blot for PI3K/GAPDH**

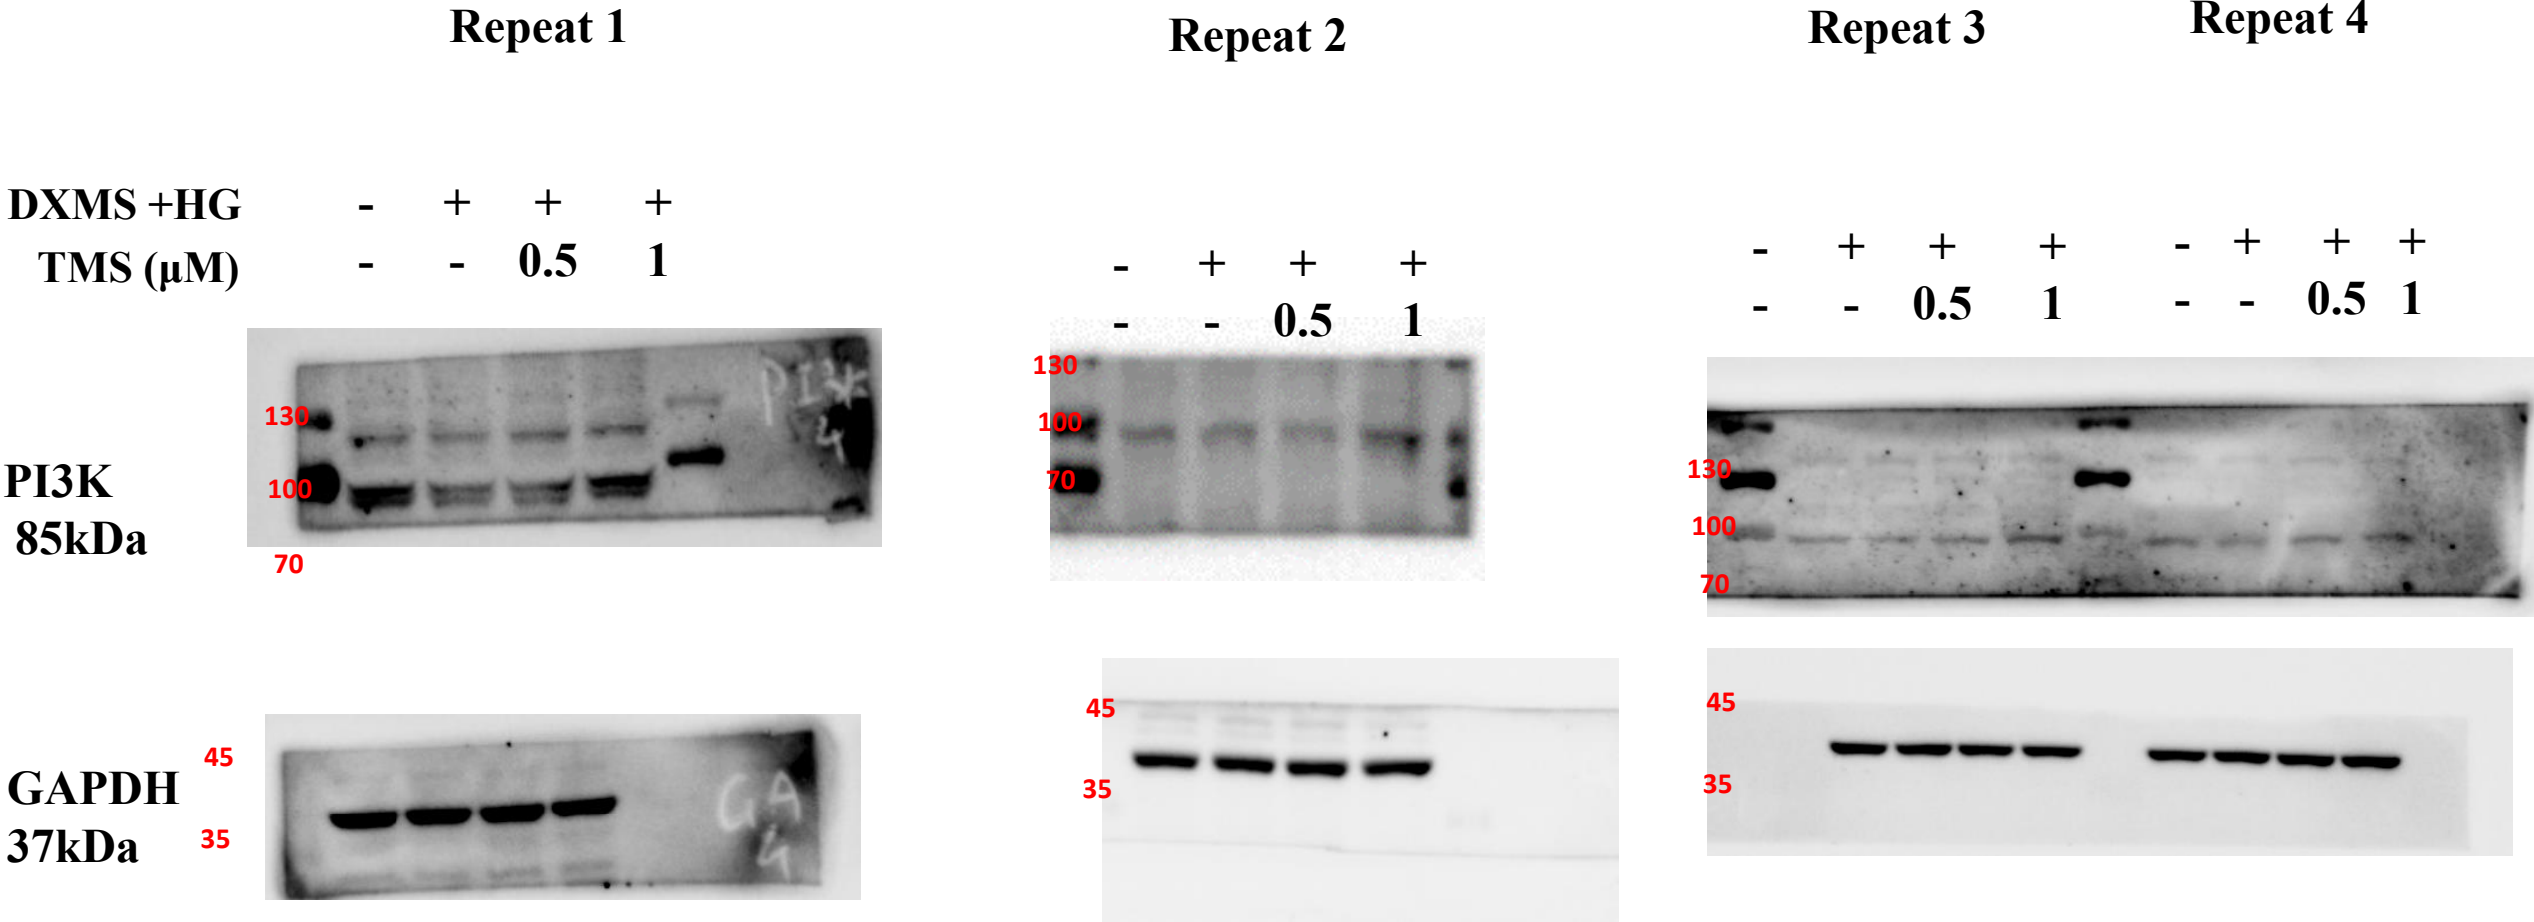

**Figure 2. Original western blot for pAkt/Akt**

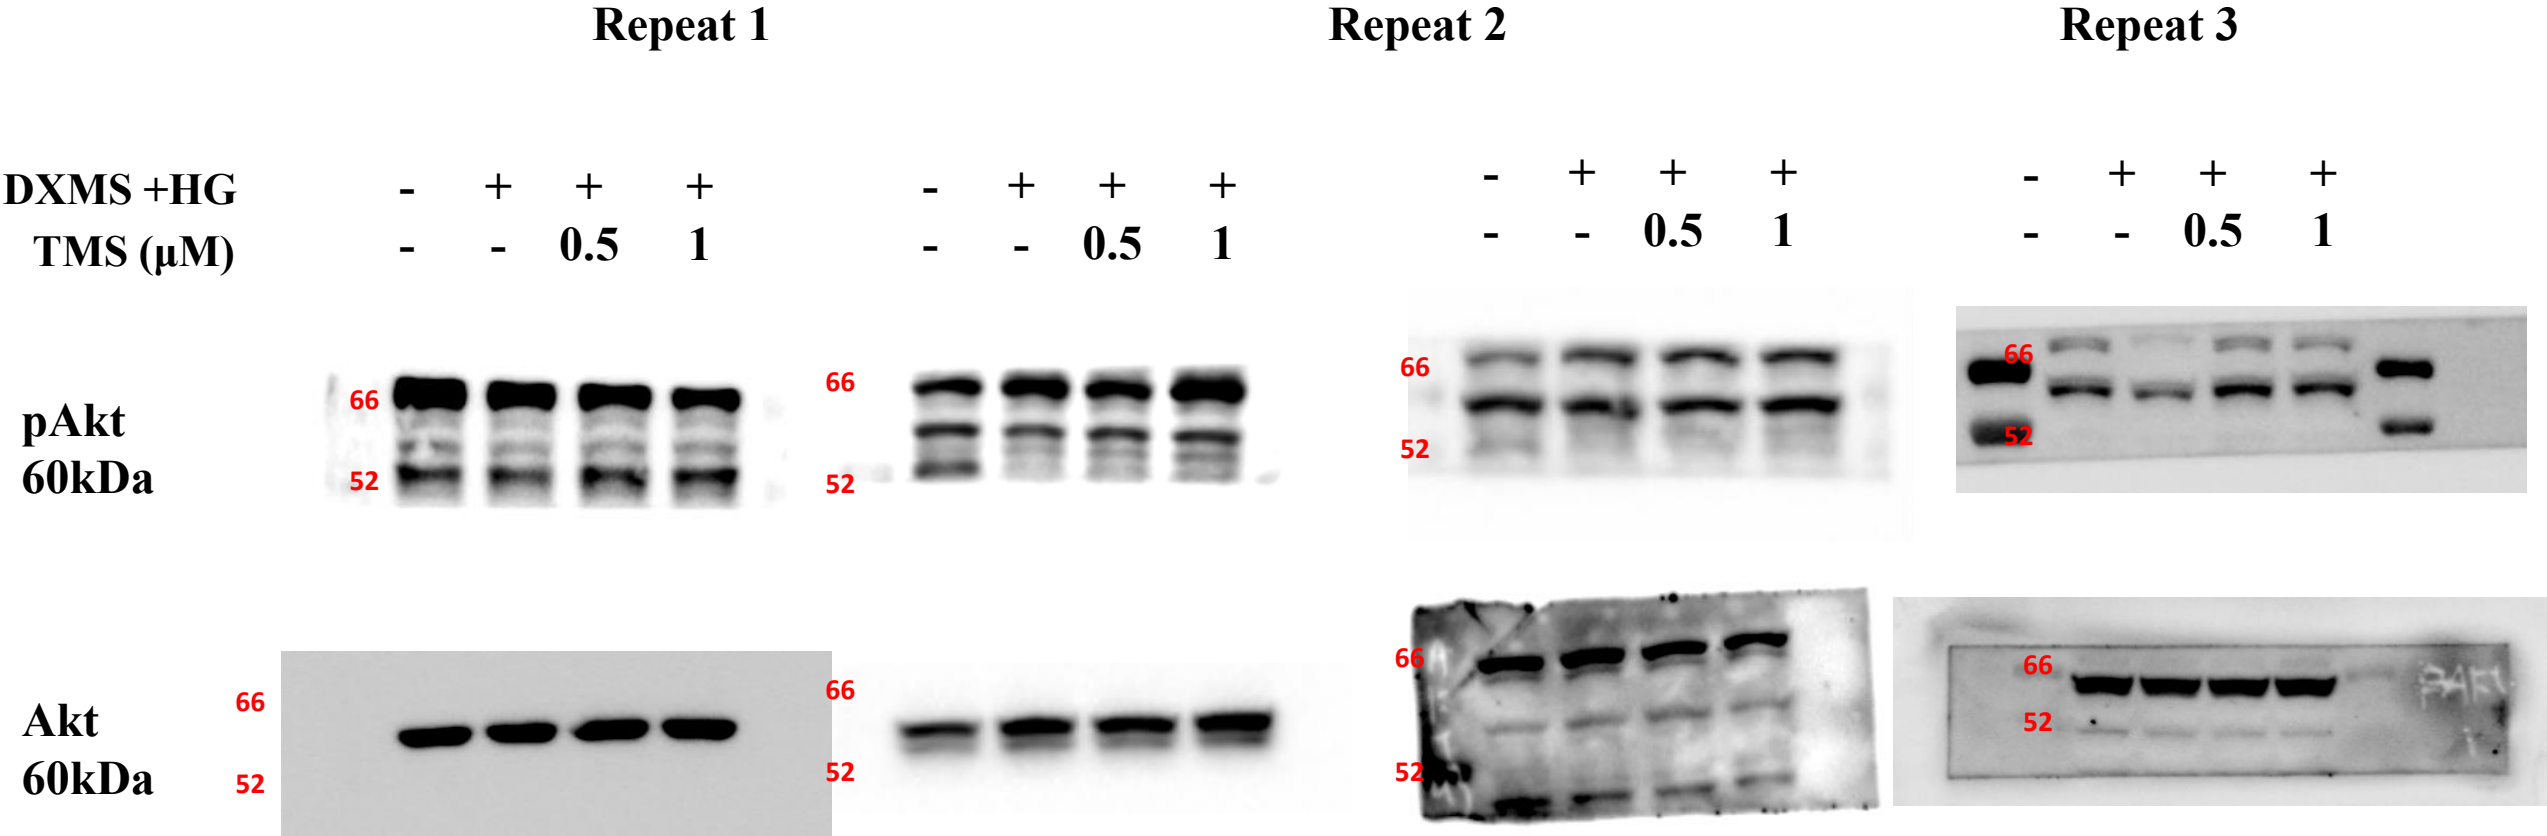

**Figure 2. Original western blot for pGsk3 $\beta$  /Gsk3 $\beta$**

**Repeat 1**

**Repeat 2**

**Repeat 3**

**Repeat 4**

**DXMS +HG** - + + +  
**TMS ( $\mu$ M)** - - 0.5 1

- + + +  
 - - 0.5 1

- + + +  
 - - 0.5 1

- + + +  
 - - 0.5 1

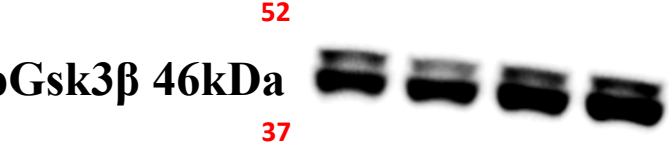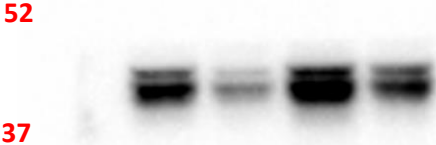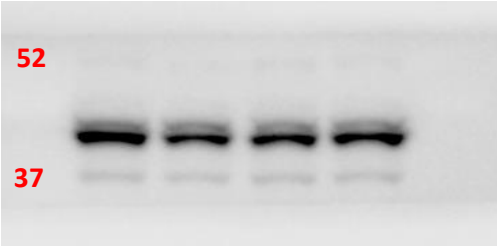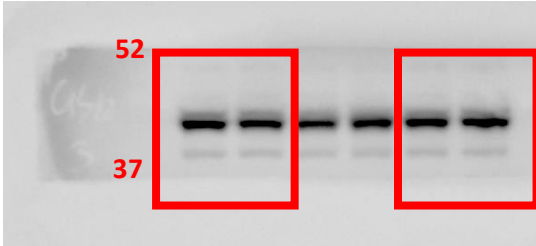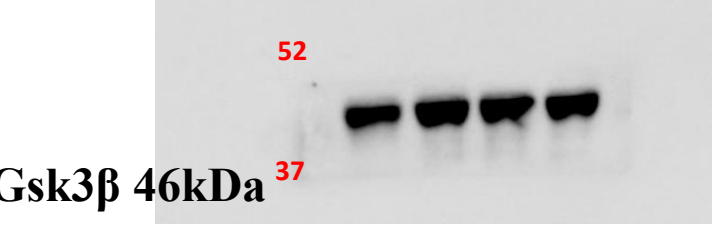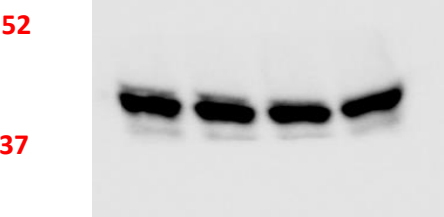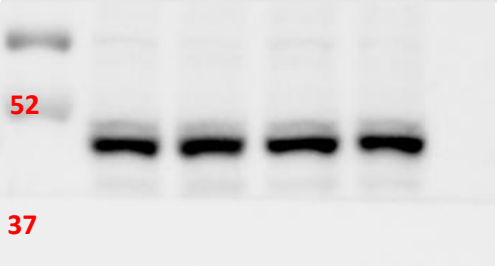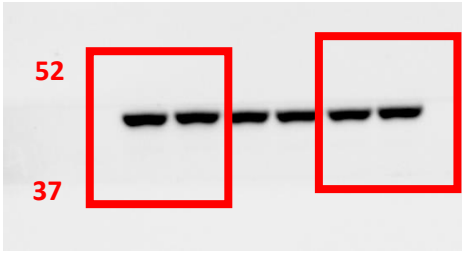

**Figure 3. Original western blot for Nrf2/GAPDH**

**Repeat 1**

**Repeat 2**

**Repeat 3**

**Repeat 4**

**DXMS +HG**    -    +    +    +  
**TMS (μM)**    -    -    0.5    1

-    +    +    +  
-    -    0.5    1

-    +    +    +  
-    -    0.5    1

-    +    +    +  
-    -    0.5    1

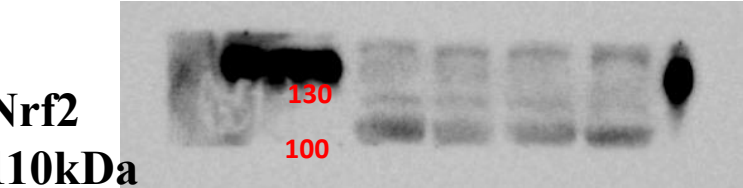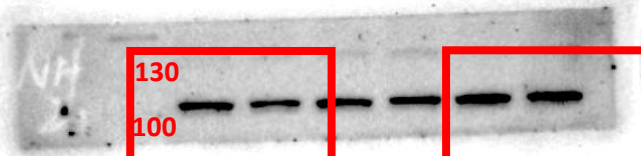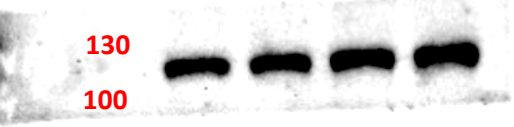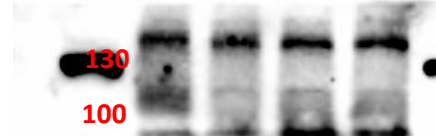

**GAPDH**  
**37kDa**

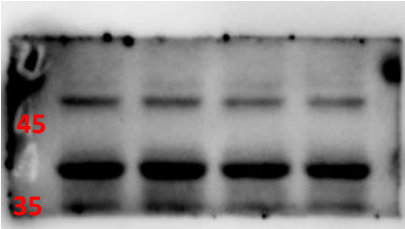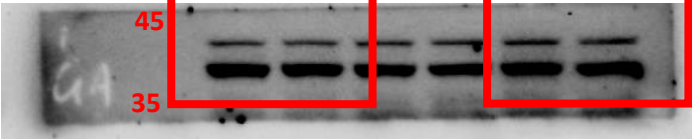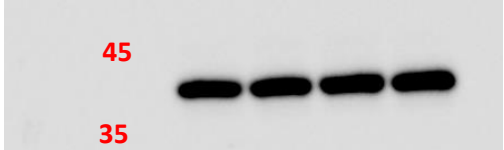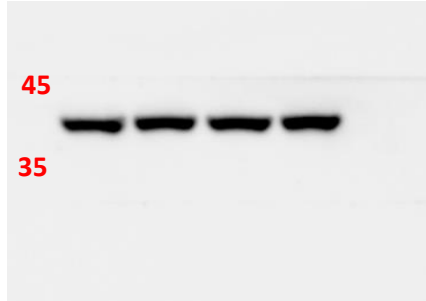

**Figure 3. Original western blot for HO-1/GAPDH**

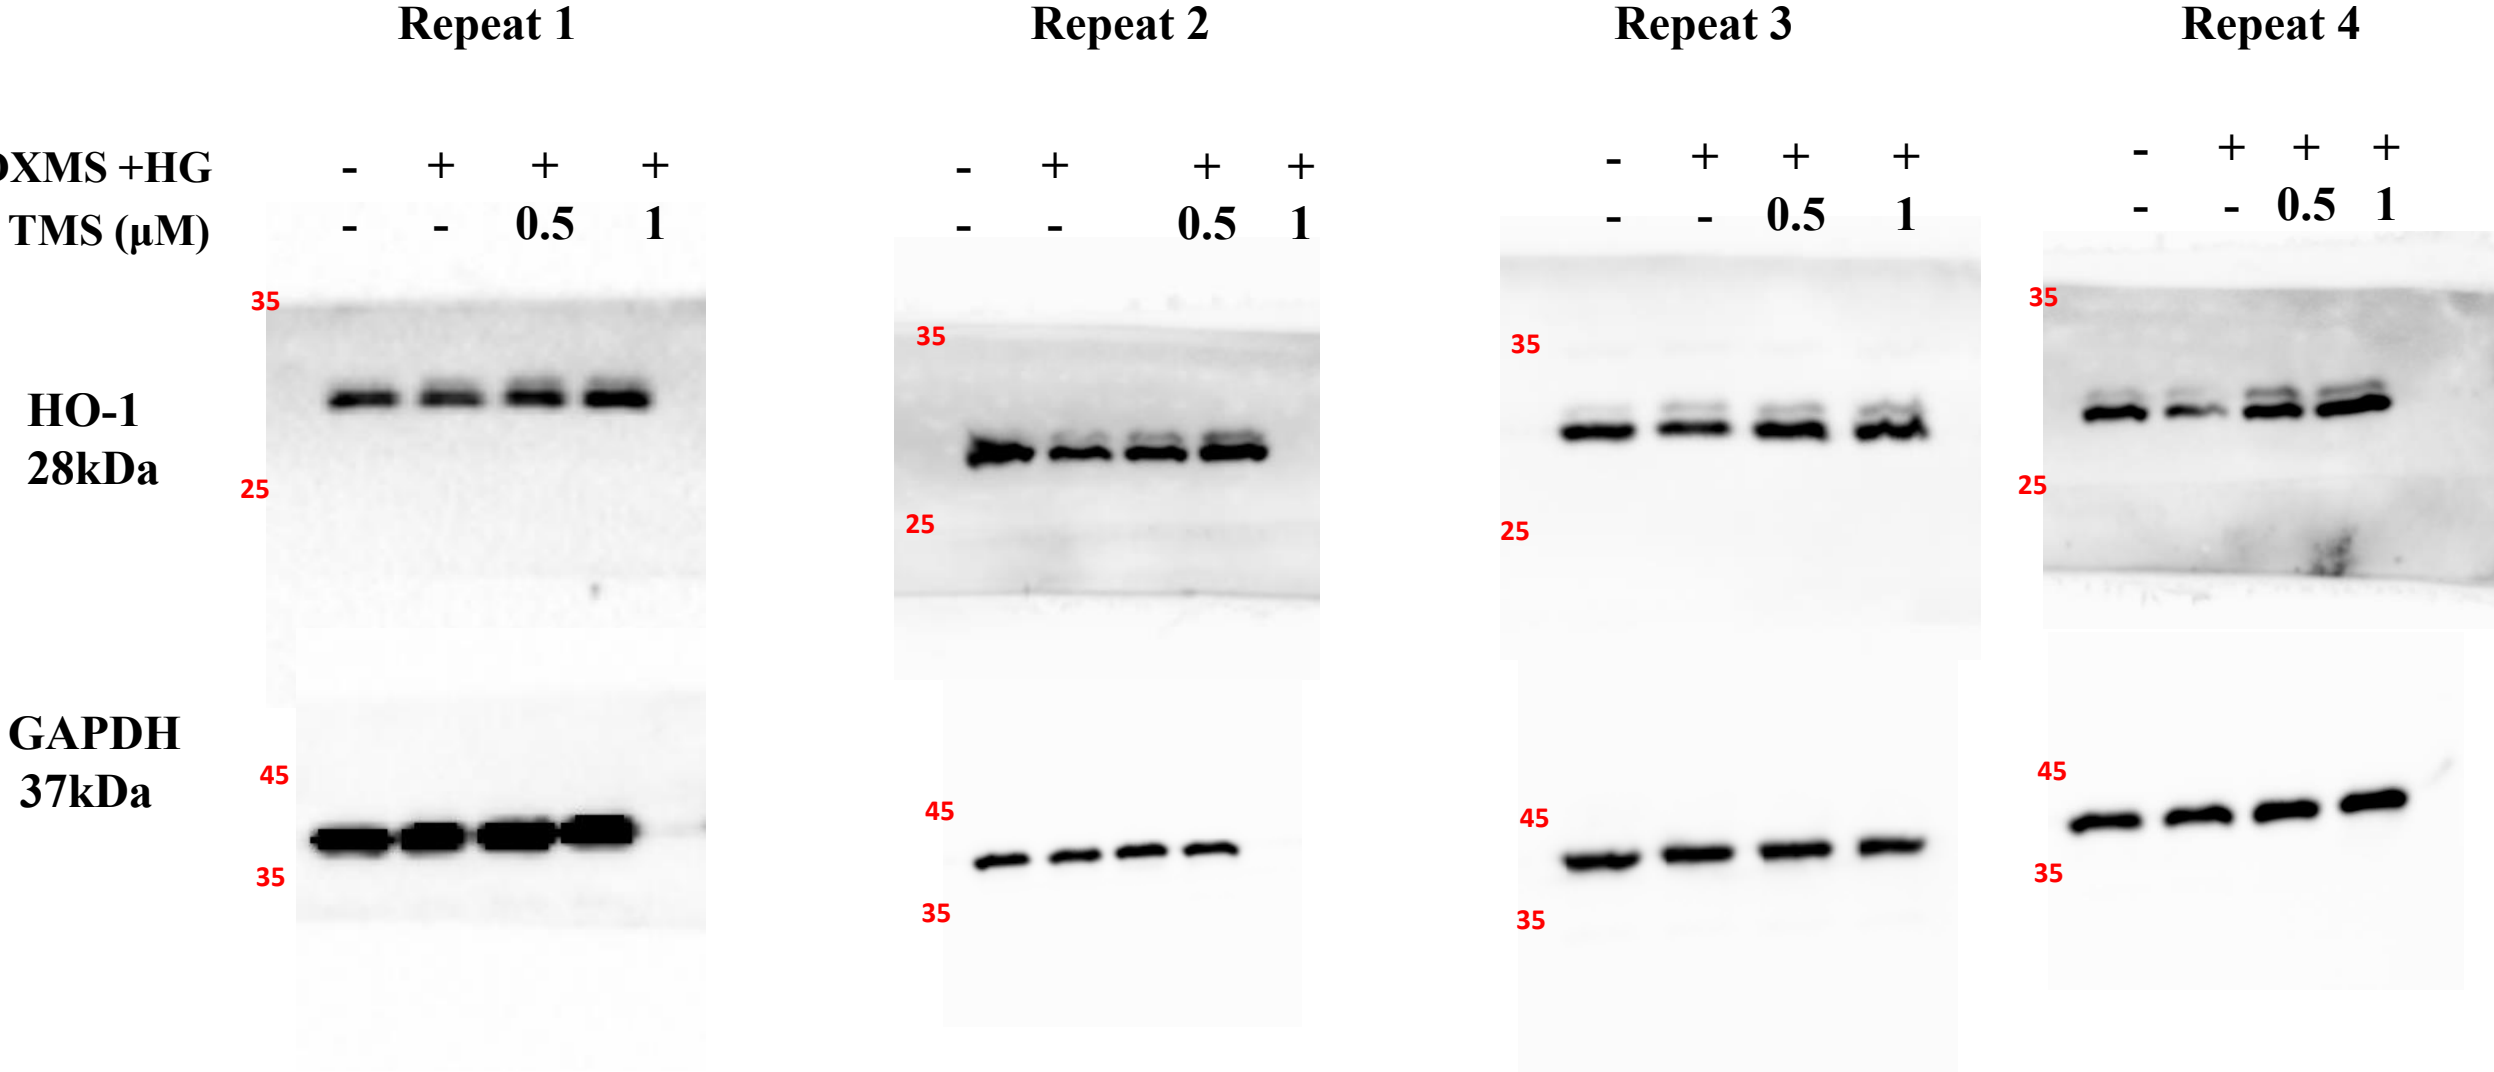

**Figure 3. Original western blot for NQO1/GAPDH**

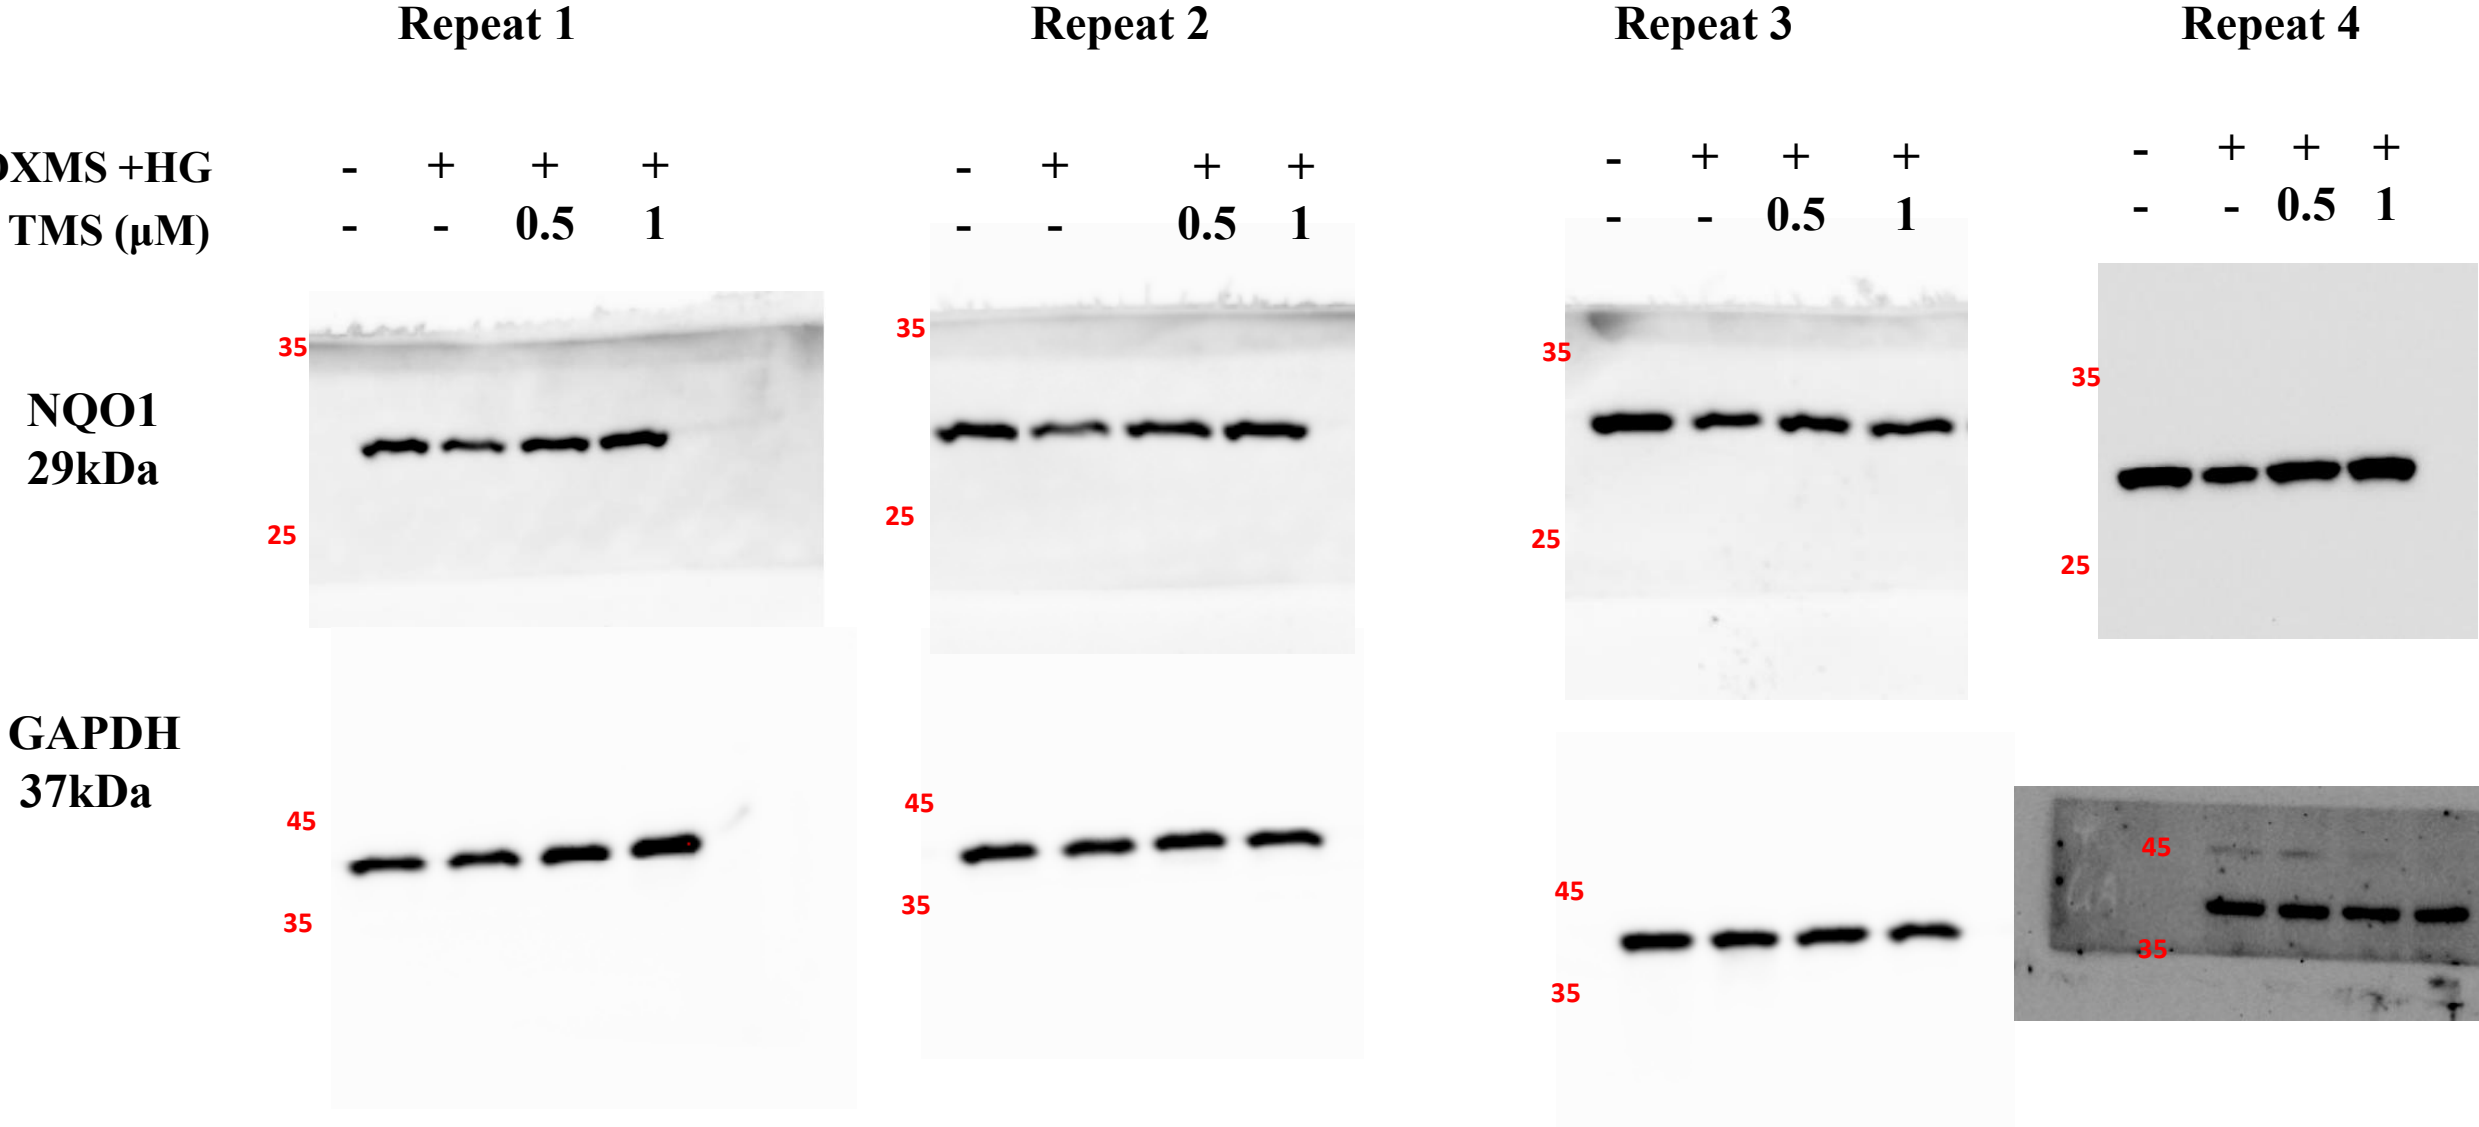



**Figure 6. Original western blot for pIRS1 /IRS1/GAPDH**

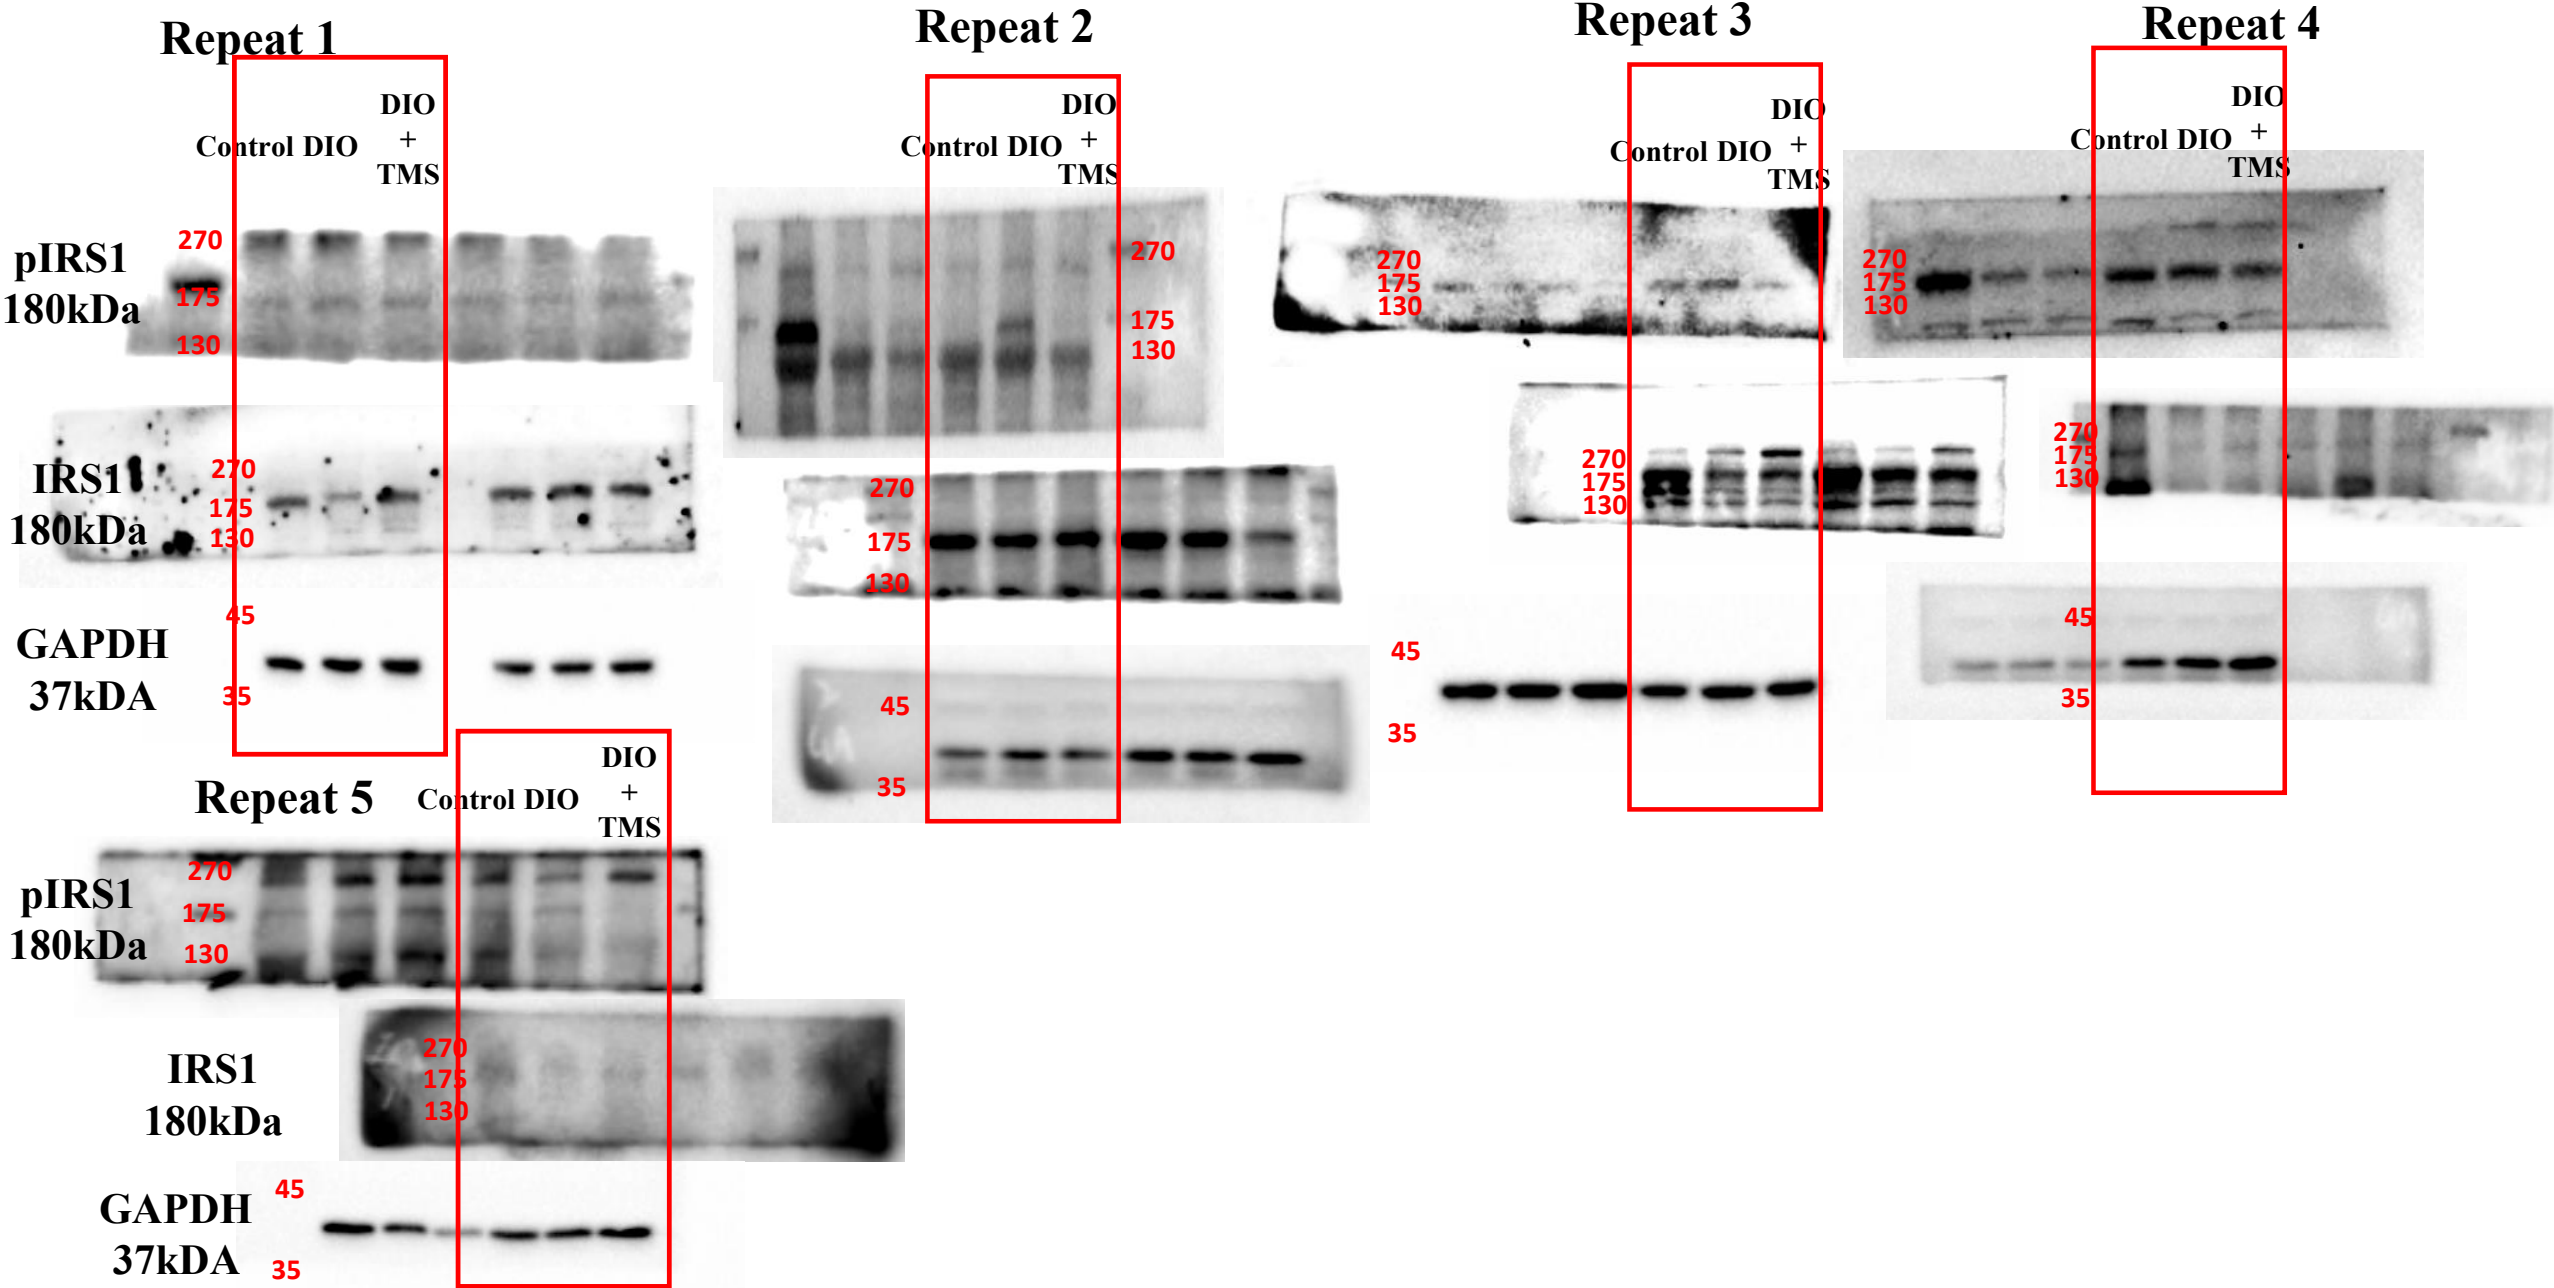

**Figure 6. Original western blot for IRS2/GAPDH**

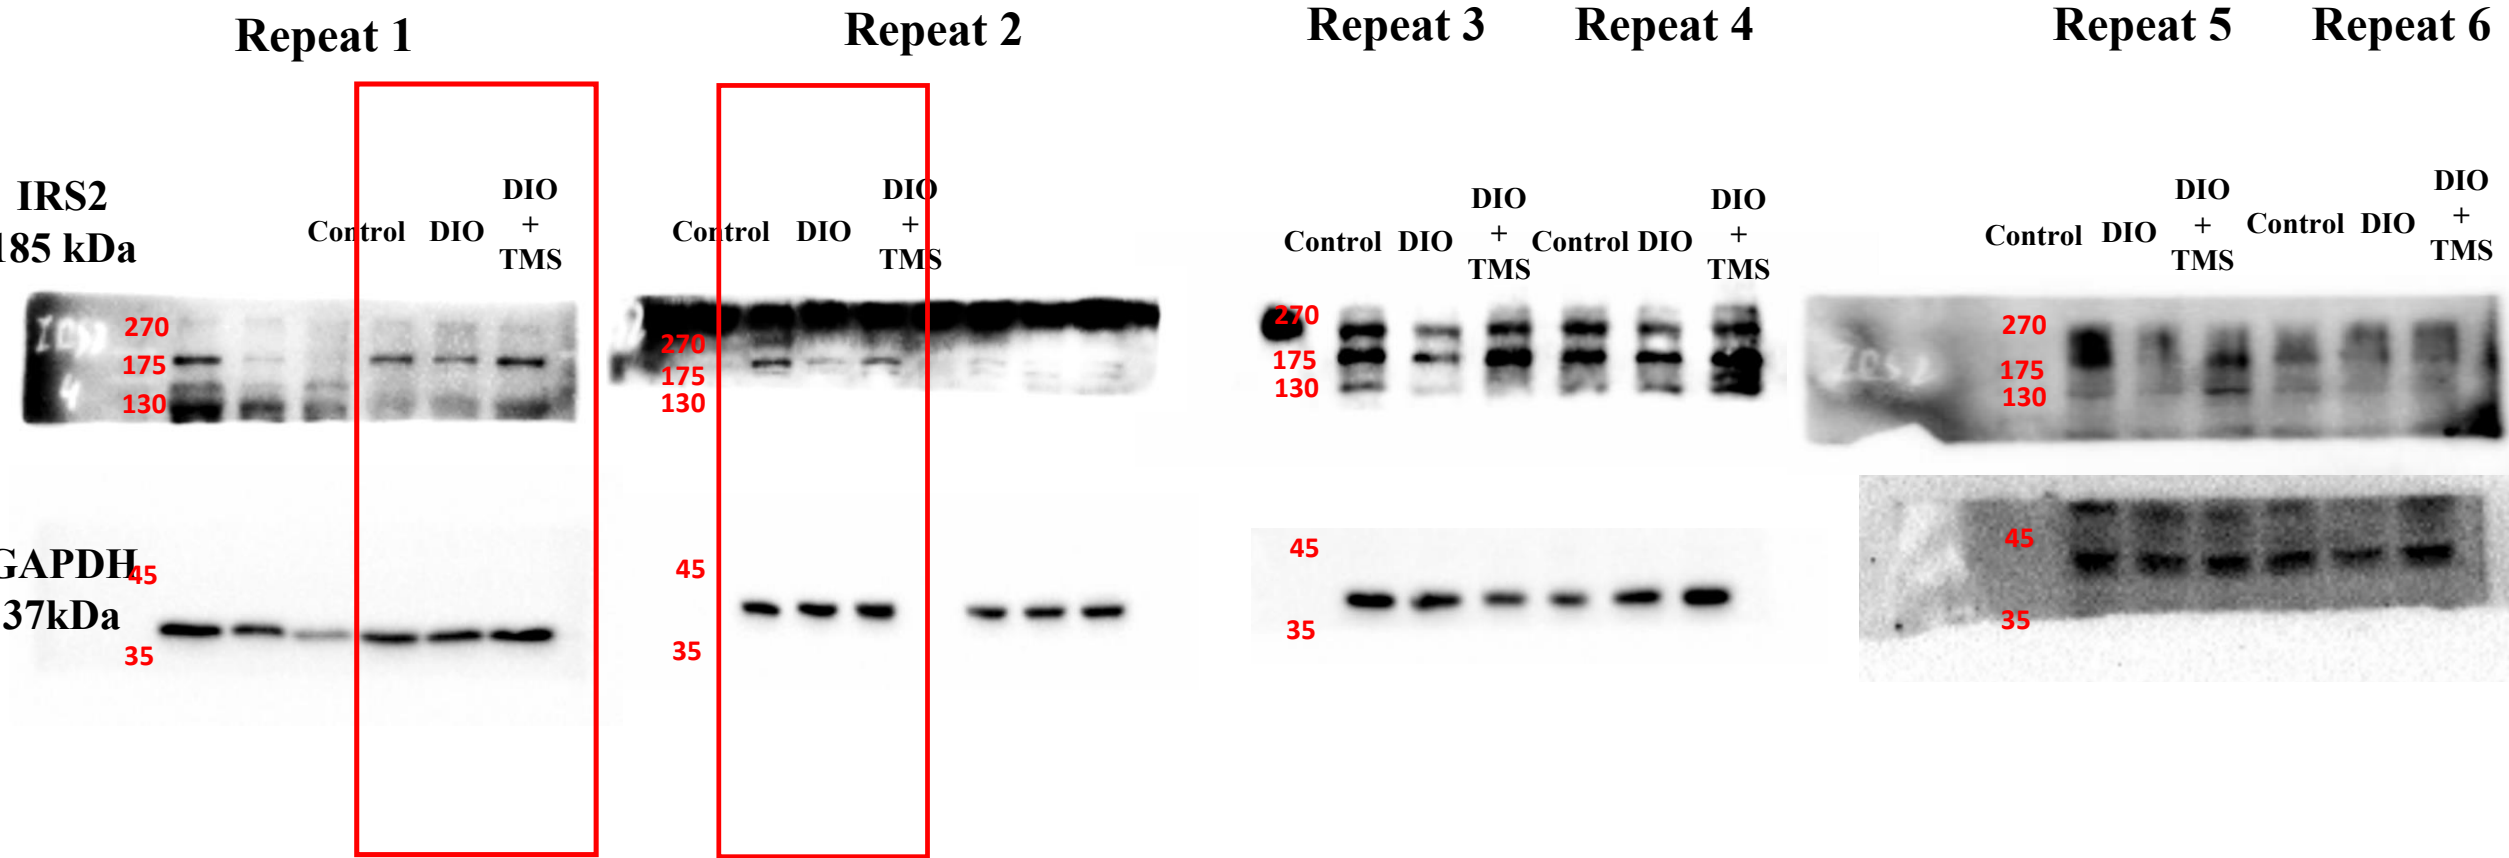

**Figure 6. Original western blot for PI3K/GAPDH**

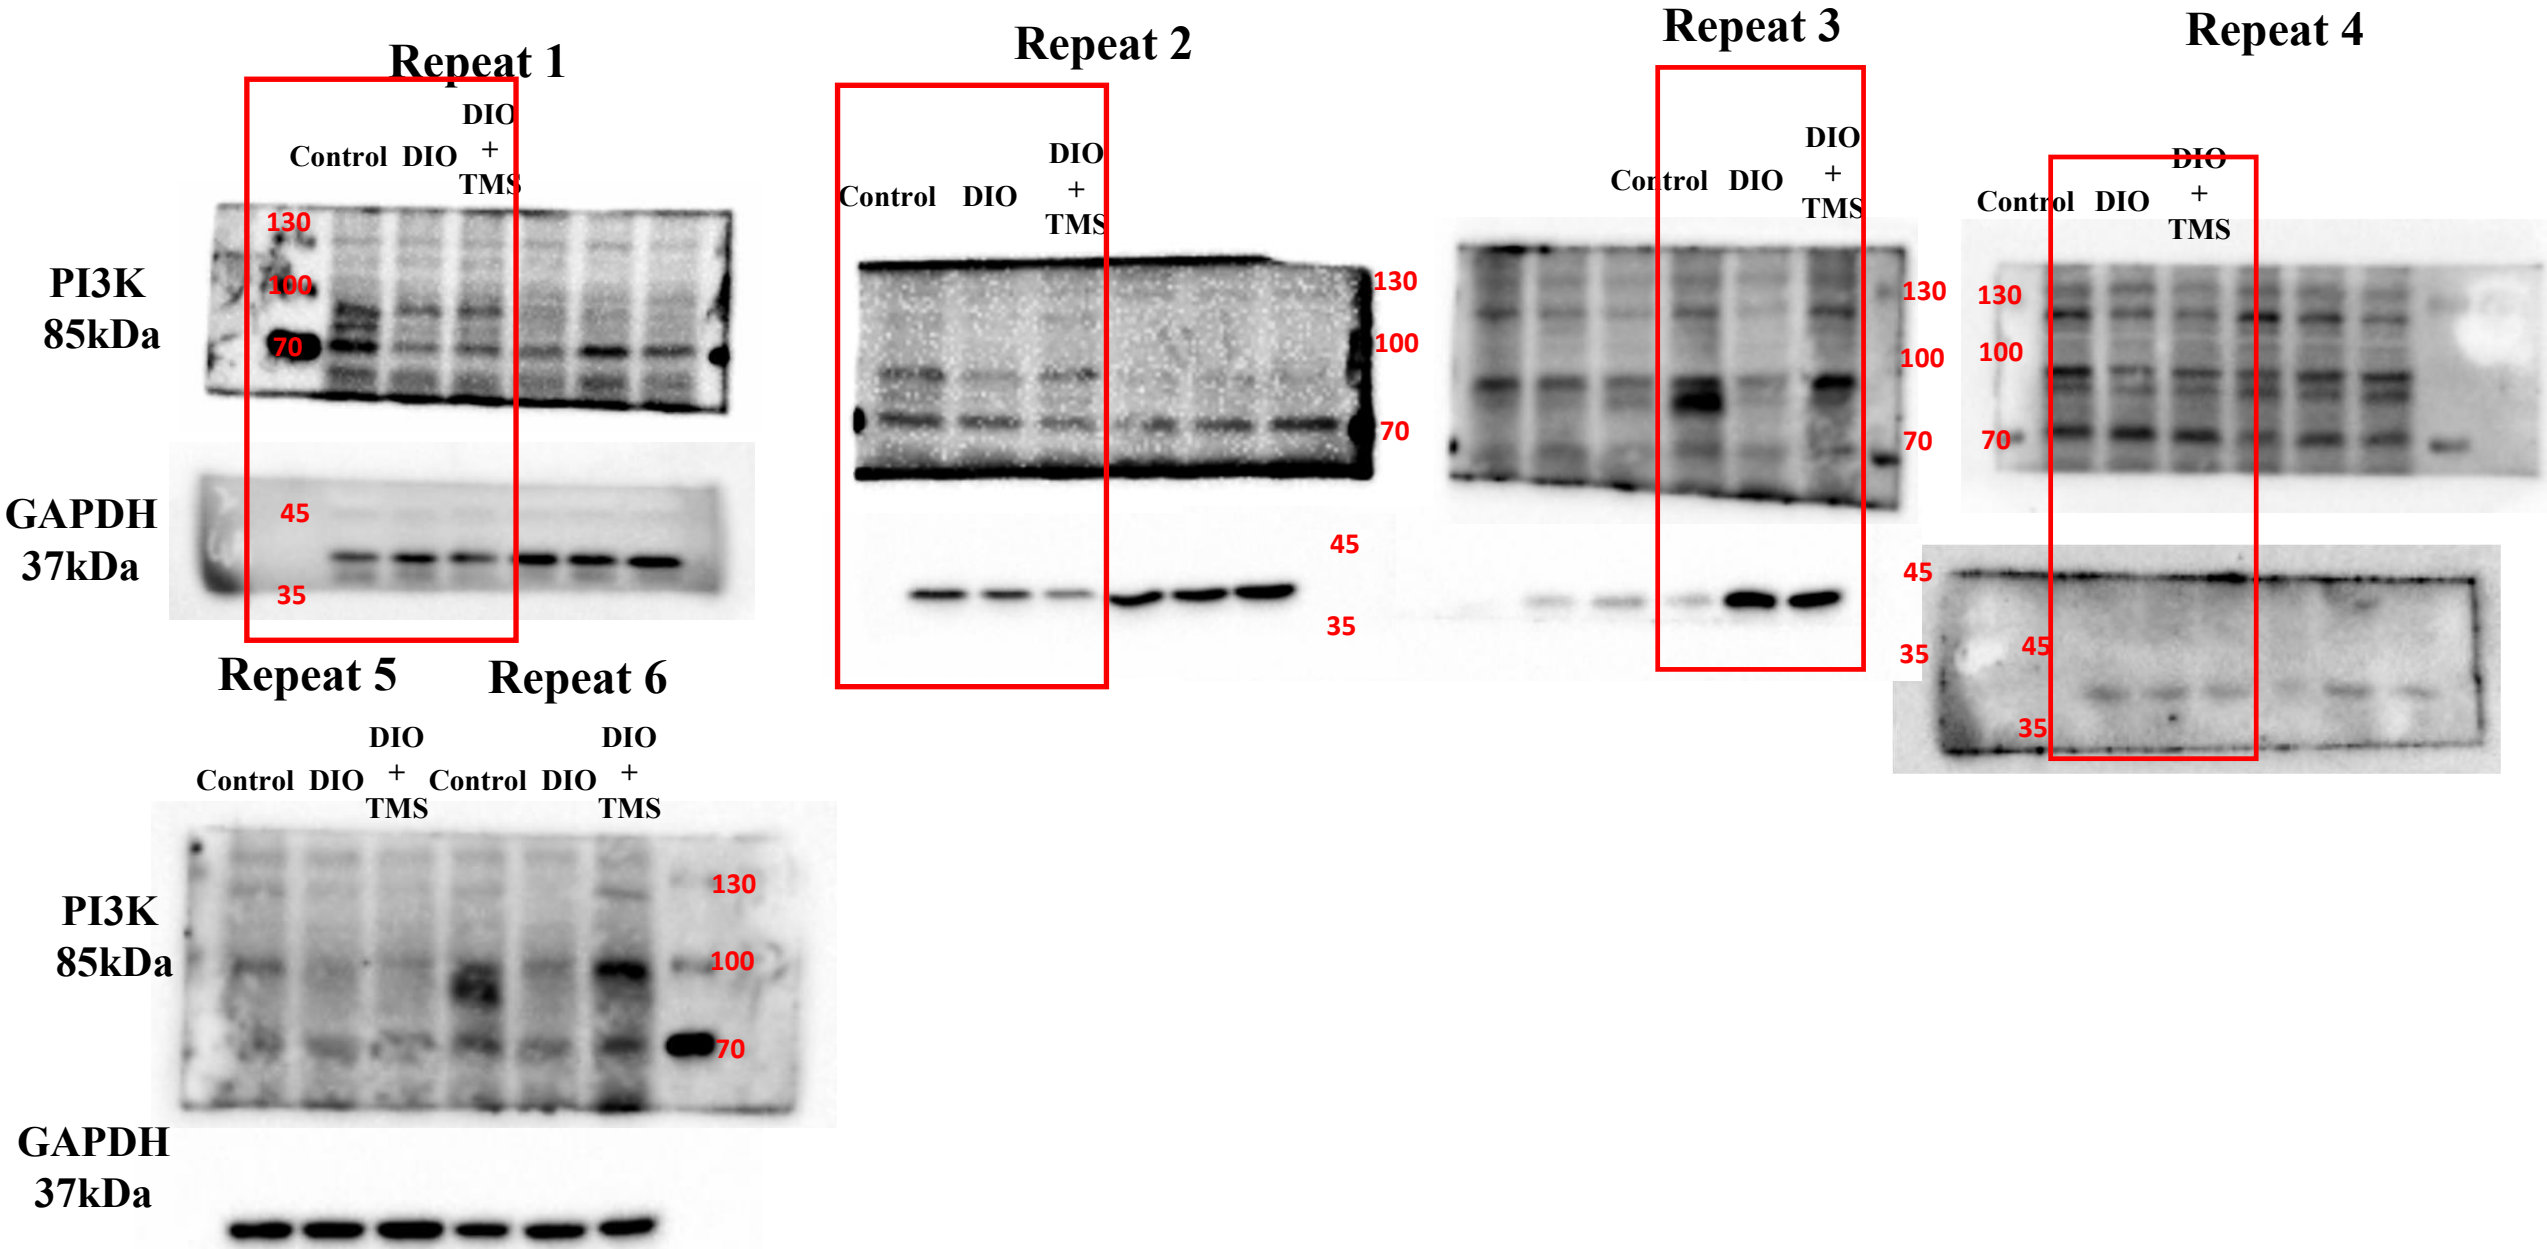

**Figure 6. Original western blot for pAkt/Akt**

**Repeat 1**

**Repeat 2**

**Repeat 3**

**Repeat 4**

**Repeat 5**

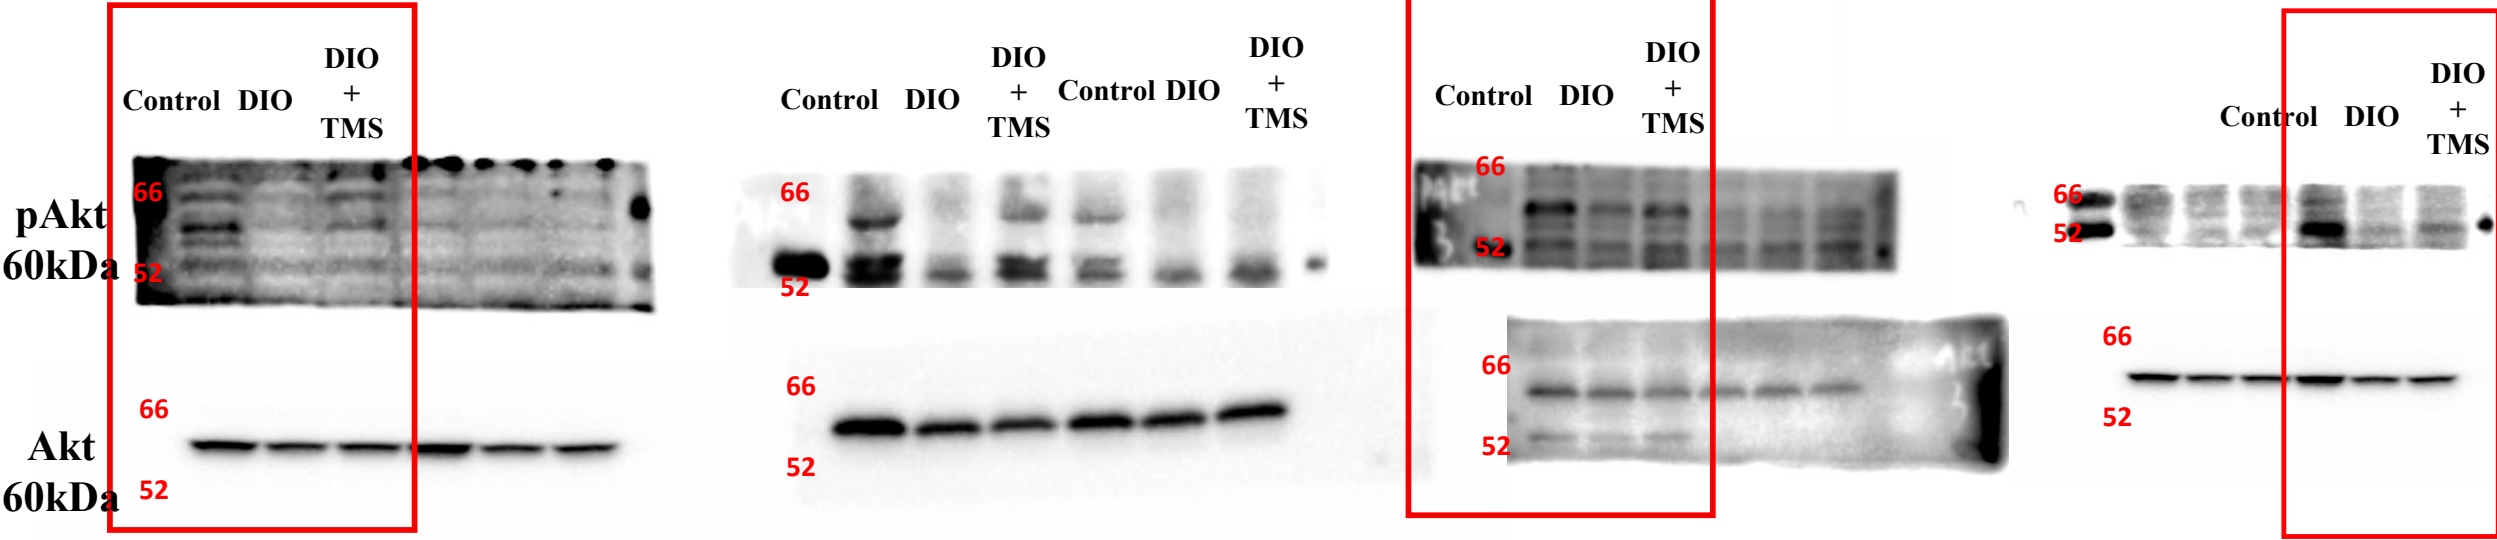

**Figure 6. Original western blot for pGsk3 $\beta$  /Gsk3 $\beta$**

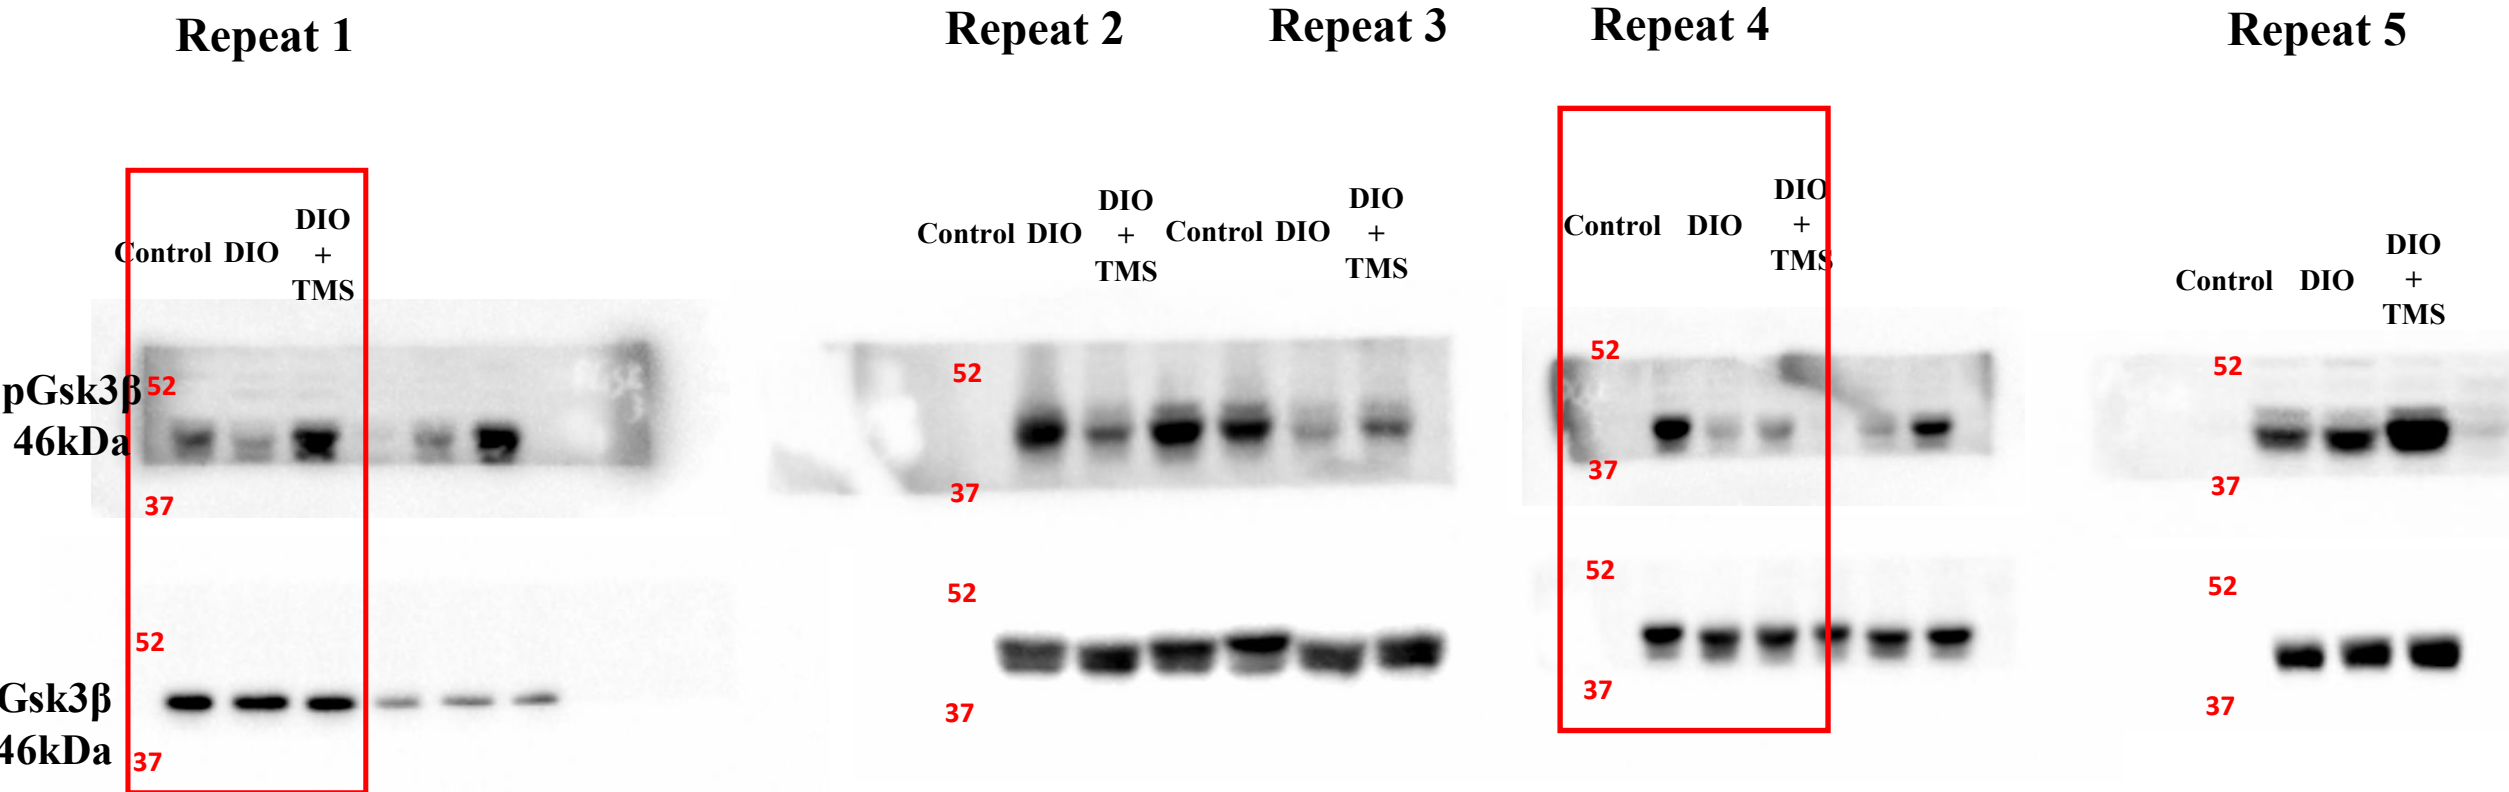

**Figure 7. Original western blot for Nrf2/GAPDH**

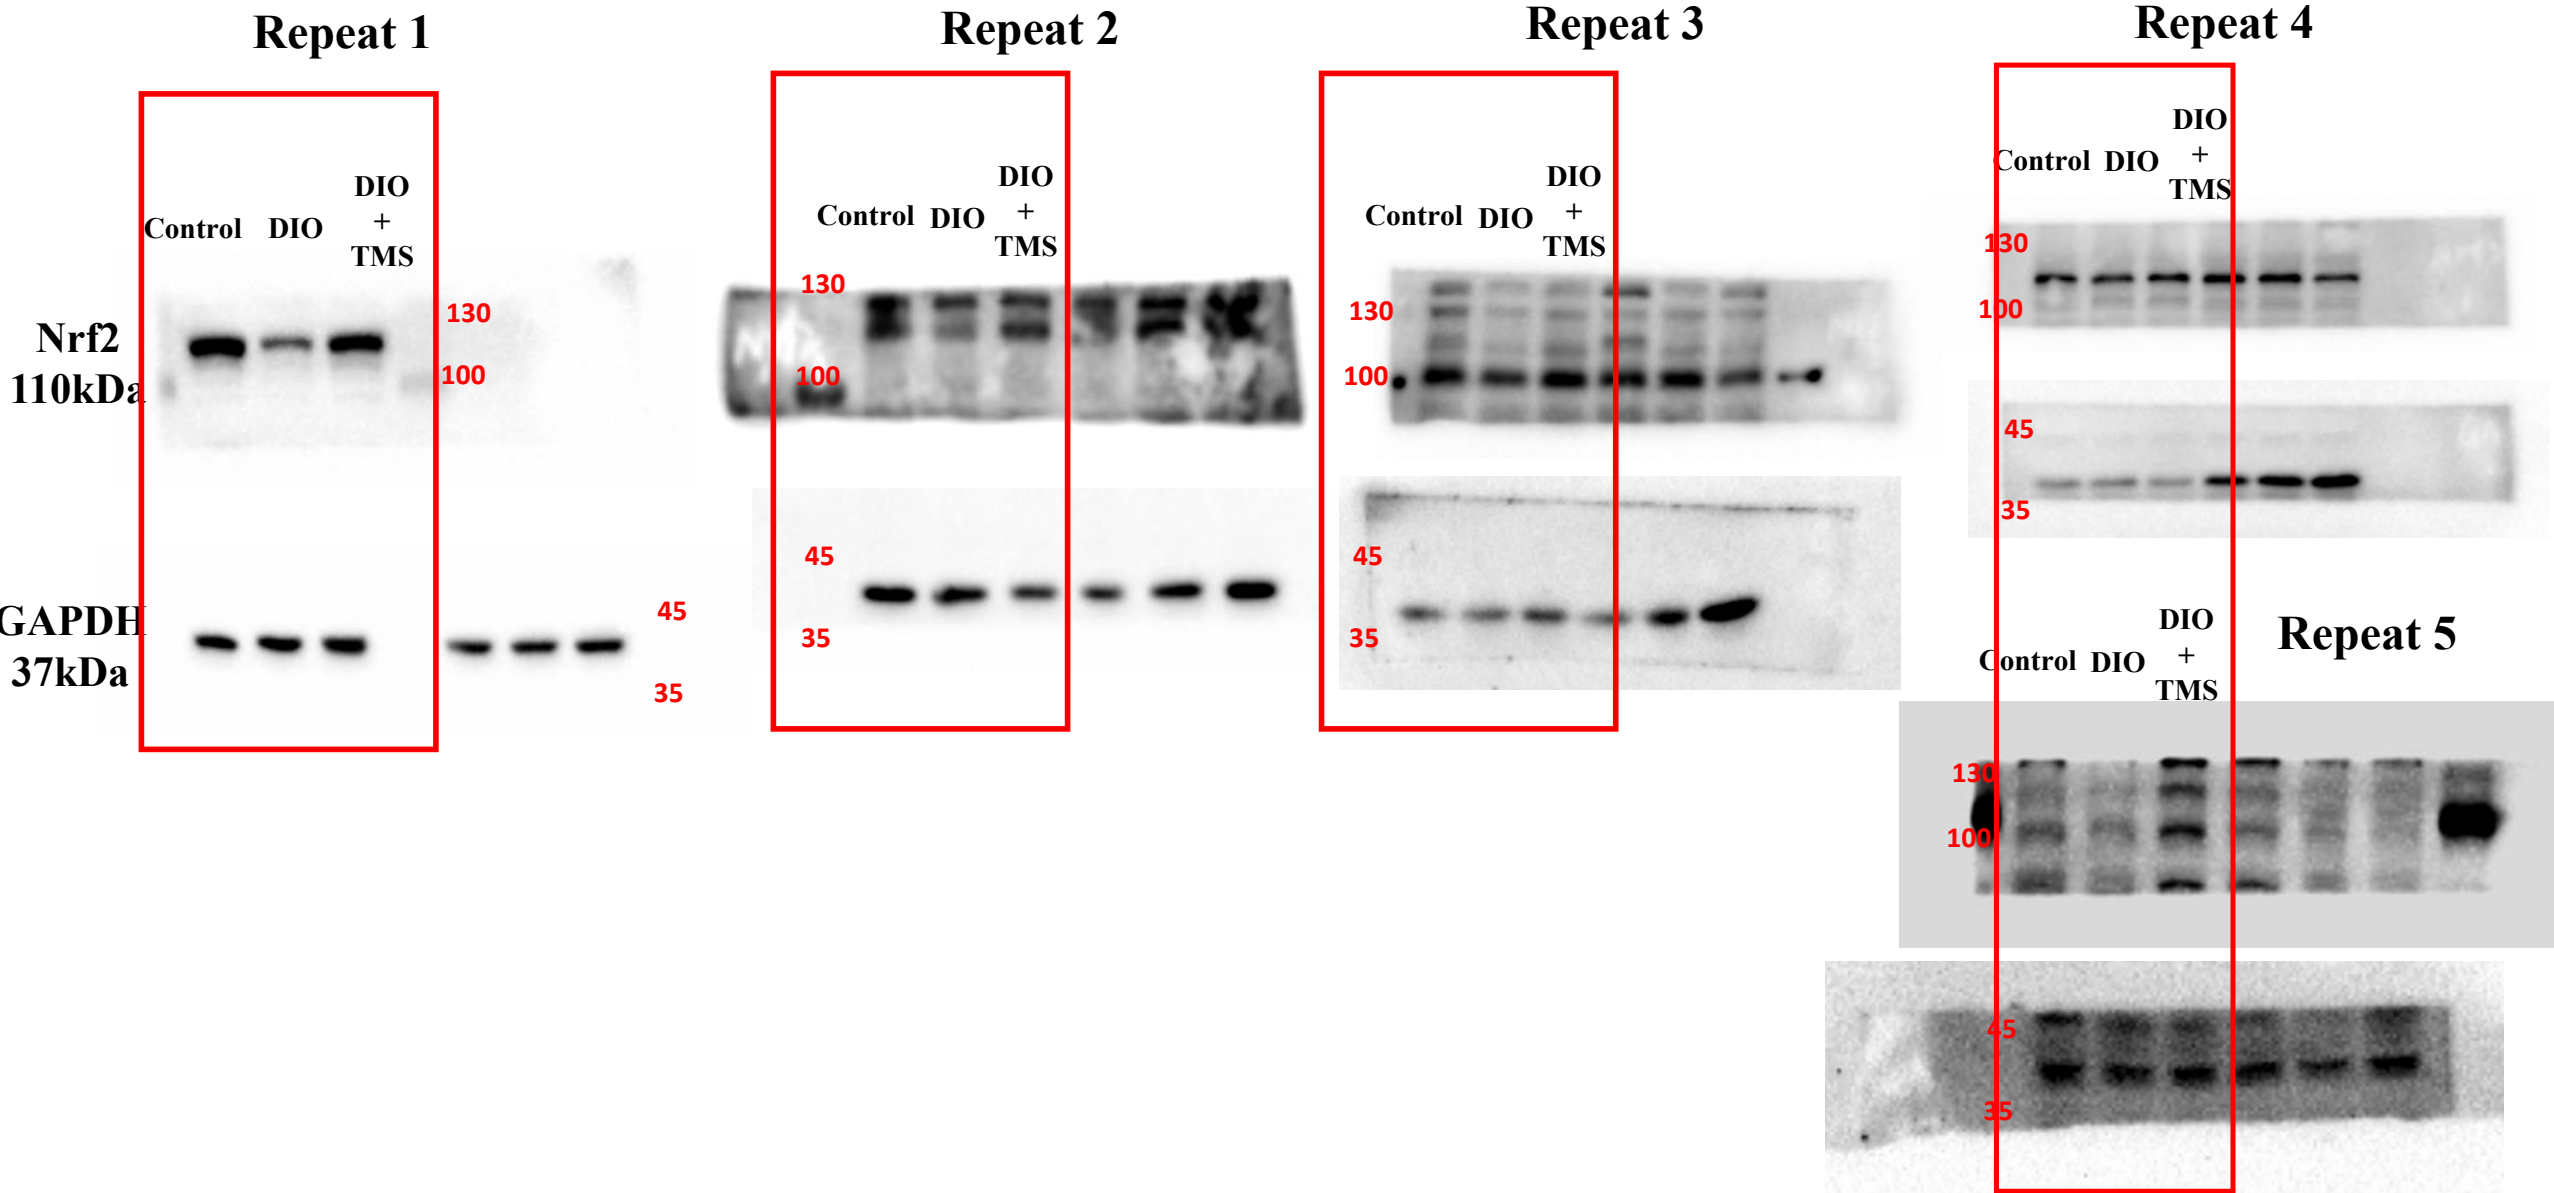

Supplement: d3fo04158a1.pdf [file d3fo04158a1.pdf]
